# Supplementary material
Source: HighWire-hosted journal article supplement (https://bmjopen.bmj.com/content/13/9/e072976)
Supplement: inline-supplementary-material-1 [file inline-supplementary-material-1.pdf]

**Appendix A – Consolidated criteria for reporting qualitative studies (COREQ): 32-item checklist**

| No                                             | Item                                     | Guide questions/description                                 | Answer                                                                                                                                       |
|------------------------------------------------|------------------------------------------|-------------------------------------------------------------|----------------------------------------------------------------------------------------------------------------------------------------------|
| <b>Domain 1: Research team and reflexivity</b> |                                          |                                                             |                                                                                                                                              |
| Personal Characteristics                       |                                          |                                                             |                                                                                                                                              |
| 1.                                             | Interviewer/facilitator                  | Which author/s conducted the interview or focus group?      | A. McCracken                                                                                                                                 |
| 2.                                             | Credentials                              | What were the researcher's credentials (e.g. PhD, MD)       | HBSc                                                                                                                                         |
| 3.                                             | Occupation                               | What was their occupation at the time of the study?         | Research and Education Coordinator                                                                                                           |
| 4.                                             | Gender                                   | Was the researcher male or female?                          | Female                                                                                                                                       |
| 5.                                             | Experience and training                  | What experience or training does the researcher have?       | 5+ years of coordinating qualitative and quantitative research.                                                                              |
| Relationship with participants                 |                                          |                                                             |                                                                                                                                              |
| 6.                                             | Relationship established                 | Was a relationship established prior to study commencement? | No.                                                                                                                                          |
| 7.                                             | Participant knowledge of the interviewer | What did the participants know about the researcher?        | Reason for doing the research: to help build a foundational block to help support students with psychotropic medication management on campus |
| 8.                                             | Interviewer characteristics              | What characteristics were reported about                    | Biases.                                                                                                                                      |

the  
interviewer/facilitator.

## Domain 2: study design

### Theoretical framework

|    |                                       |                                                                   |                            |
|----|---------------------------------------|-------------------------------------------------------------------|----------------------------|
| 9. | Methodological orientation and theory | What methodological orientation was stated to underpin the study? | Interpretative description |
|----|---------------------------------------|-------------------------------------------------------------------|----------------------------|

### Participant selection

|     |                    |                                                        |                                                                                |
|-----|--------------------|--------------------------------------------------------|--------------------------------------------------------------------------------|
| 10. | Sampling           | How were participants selected?                        | Snowball sampling                                                              |
| 11. | Method of approach | How were participants approached?                      | Face-to-face, email, social media                                              |
| 12. | Sample size        | How many participants were in the study?               | 20-25                                                                          |
| 13. | Non-participation  | How many people refused to participate or dropped out? | N/A at this stage of study. Will be reported once data collection is complete. |

### Setting

|     |                              |                                                                   |                                                                |
|-----|------------------------------|-------------------------------------------------------------------|----------------------------------------------------------------|
| 14. | Setting of data collection   | Where was the data collected?                                     | Leslie Dan Faculty of Pharmacy, University of Toronto and Home |
| 15. | Presence of non-participants | Was anyone else present besides the participants and researchers? | No.                                                            |
| 16. | Description of sample        | What are the important characteristics of the sample?             | Demographic data                                               |

### Data Collection

|     |                 |                                                 |      |
|-----|-----------------|-------------------------------------------------|------|
| 17. | Interview guide | Were questions, prompts, guides provided by the | Yes. |
|-----|-----------------|-------------------------------------------------|------|

|                                        |                                |                                                                         |                        |
|----------------------------------------|--------------------------------|-------------------------------------------------------------------------|------------------------|
|                                        |                                | authors? Was it pilot tested.                                           |                        |
| 18.                                    | Repeat interviews              | Were repeat interviews carried out? If yes, how many?                   | N/A at this time.      |
| 19.                                    | Audio/visual recording         | Did the research use audio or visual recording to collect the data?     | Yes.                   |
| 20.                                    | Field notes                    | Were field notes made during and/or after the interview or focus group? | N/A at this time.      |
| 21.                                    | Duration                       | What was the duration of the interviews or focus groups?                | 30 minutes.            |
| 22.                                    | Data saturation                | Was data saturation discussed?                                          | Yes.                   |
| 23.                                    | Transcripts returned           |                                                                         |                        |
| <b>Domain 3: analysis and findings</b> |                                |                                                                         |                        |
| Data analysis                          |                                |                                                                         |                        |
| 24.                                    | Number of data coders          | How many data coders coded the data?                                    | TBD.                   |
| 25.                                    | Description of the coding tree | Did authors provide a description of the coding tree?                   | N/A at this time.      |
| 26.                                    | Derivation of themes           | Were themes identified in advance or derived from the data?             | Derived from the data. |
| 27.                                    | Software                       | What software, if application was used to manage the data?              | NVivo.                 |
| 28.                                    | Participant checking           | Did participants provide feedback on the findings?                      | N/A at this time.      |
| Reporting                              |                                |                                                                         |                        |

|     |                              |                                                                                                                             |                   |
|-----|------------------------------|-----------------------------------------------------------------------------------------------------------------------------|-------------------|
| 29. | Quotations presented         | Were participant quotations presented to illustrate themes/findings? Was each quotation identified? E.g. participant number | N/A at this time. |
| 30. | Data and findings consistent | Was there consistency between the data presented and the findings?                                                          | N/A at this time. |
| 31. | Clarity of major themes      | Were major themes clearly presented in the findings?                                                                        | N/A at this time. |
| 32. | Clarity of minor themes      | Is there a description of diverse cases or discussion of minor themes?                                                      | N/A at this time. |

### Reference

Tong A, Sainsbury P, Craig J. Consolidated criteria for reporting qualitative research (COREQ): a 32-item checklist for interviews and focus groups, *International Journal for Quality in Health Care*, Volume 19, Issue 6, December 2007, Pages 349–357, <https://doi.org/10.1093/intqhc/mzm042>
